# Supplementary material for: Anticancer activity of repurposed hemostatic agent desmopressin on AVPR2-expressing human osteosarcoma
Source: PubMed Central journal article supplement — Exp Ther Med. 2021 Mar 26;21(6):566. doi: 10.3892/etm.2021.9998 (PMC8027742; doi:10.3892/etm.2021.9998), 2021-03-26

Figure S1. (A) Mean and (B) individual mouse tumor volumes measured over time from day 4 after osteosarcoma cell inoculation in athymic mice. Results are expressed as mean  $\pm$  SEM. \*\*\*\* $P < 0.0001$ . dDAVP, desmopressin.

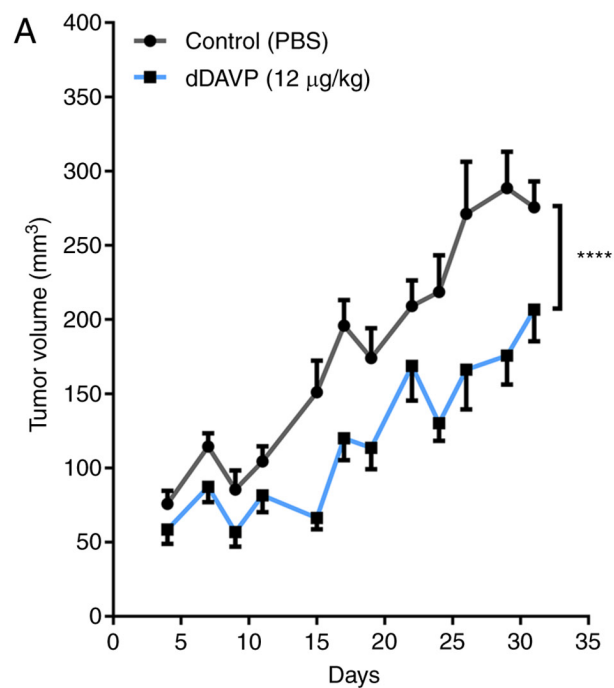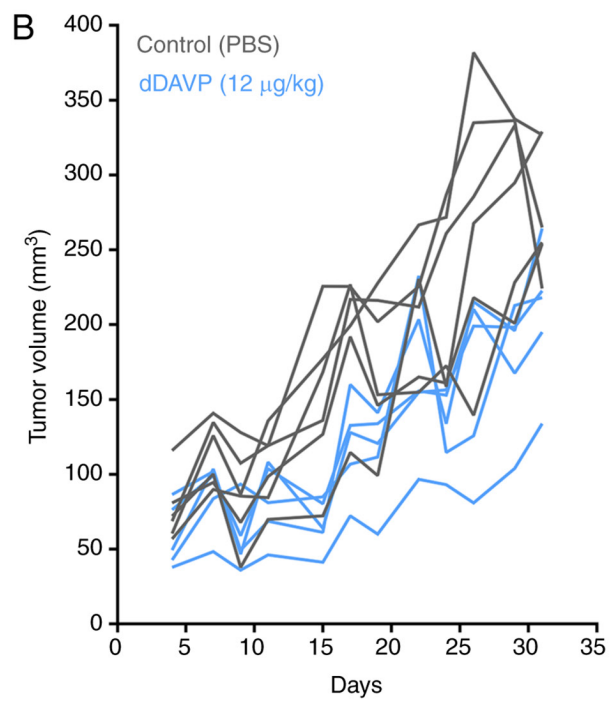

Supplement: Supplementary_Data.pdf [file Supplementary_Data.pdf]
